# Supplementary material
Source: publisher figshare collection journal article supplement (https://gsajournals.figshare.com/articles/dataset/_/7294976)
Supplement: Supplementary file 1 [file 1]

**A**

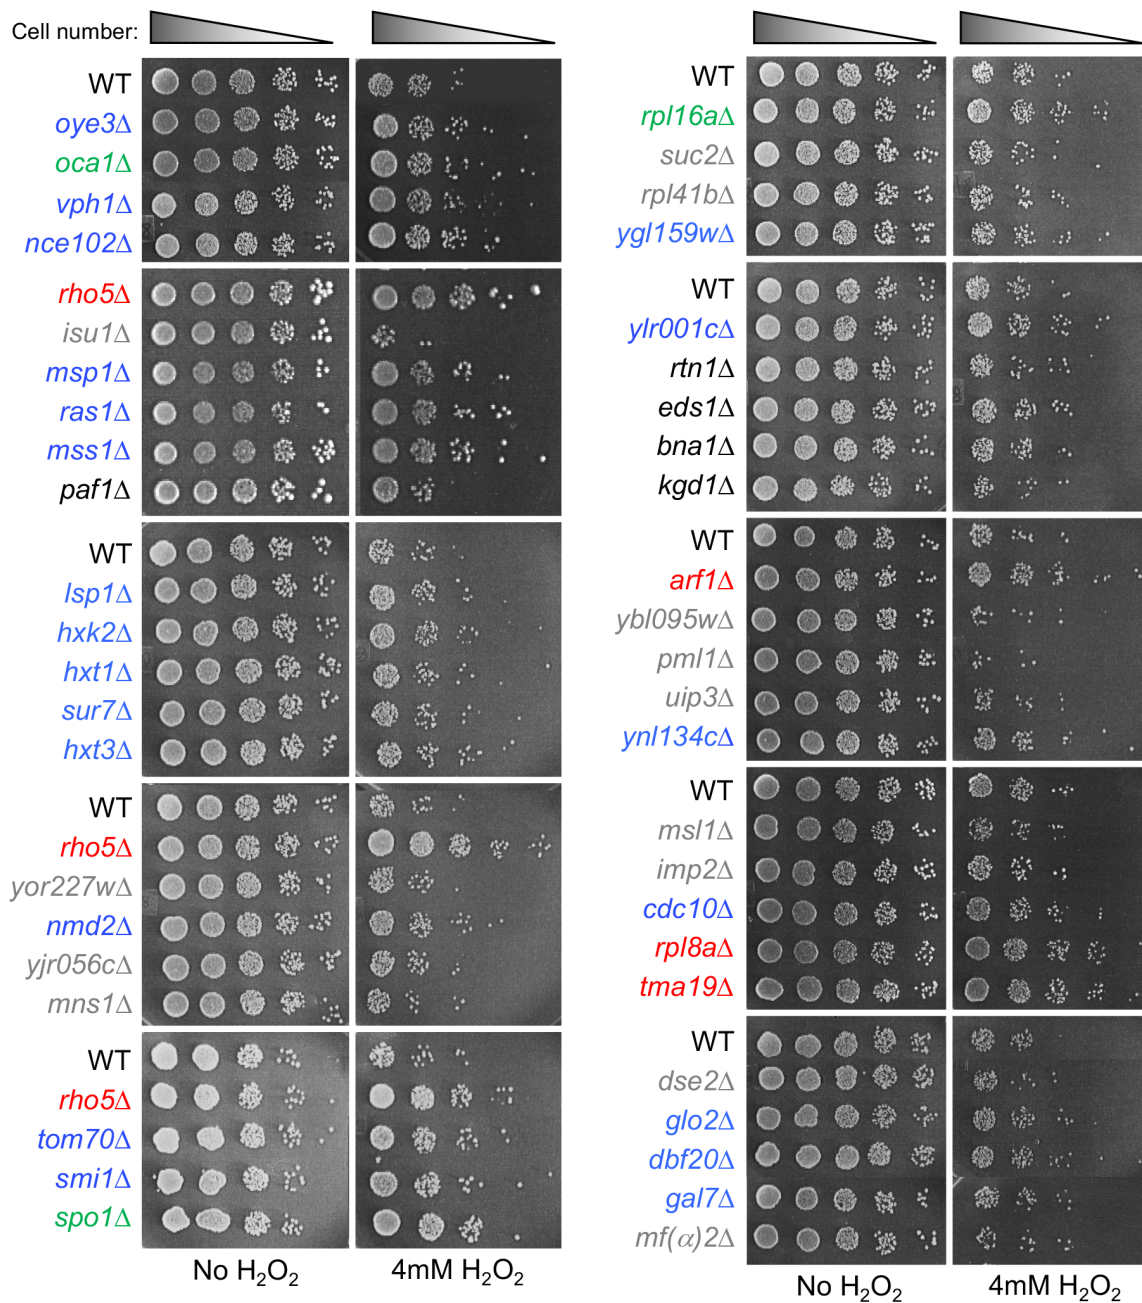

**B**

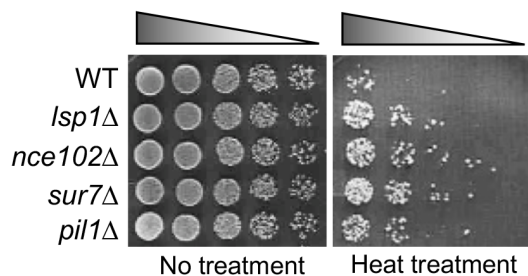

**Figures S1. Resistance of selected deletion mutants to H<sub>2</sub>O<sub>2</sub>**

A. Five-fold serial dilutions of each deletion mutant (HPY210 background) were spotted after treatment with 4 mM H<sub>2</sub>O<sub>2</sub> for 4 hrs or mock-treatment. Mutants with different degrees of resistance to H<sub>2</sub>O<sub>2</sub> are marked in color: strong resistance (similar to *rho5Δ*) in red; medium resistance in green; weak

resistance (slightly more resistant than WT) in blue; and some examples of mutants with similar phenotype as WT in gray.

- B. Cell survival was determined by a 5-fold serial dilution of each strain (BY4741 background) from fresh cultures ( $OD_{600} = 0.5\sim 0.6$ ) after subjecting to heat ramp (right) and without treatment (left) and then grown in YPD plate (see Materials and Methods).

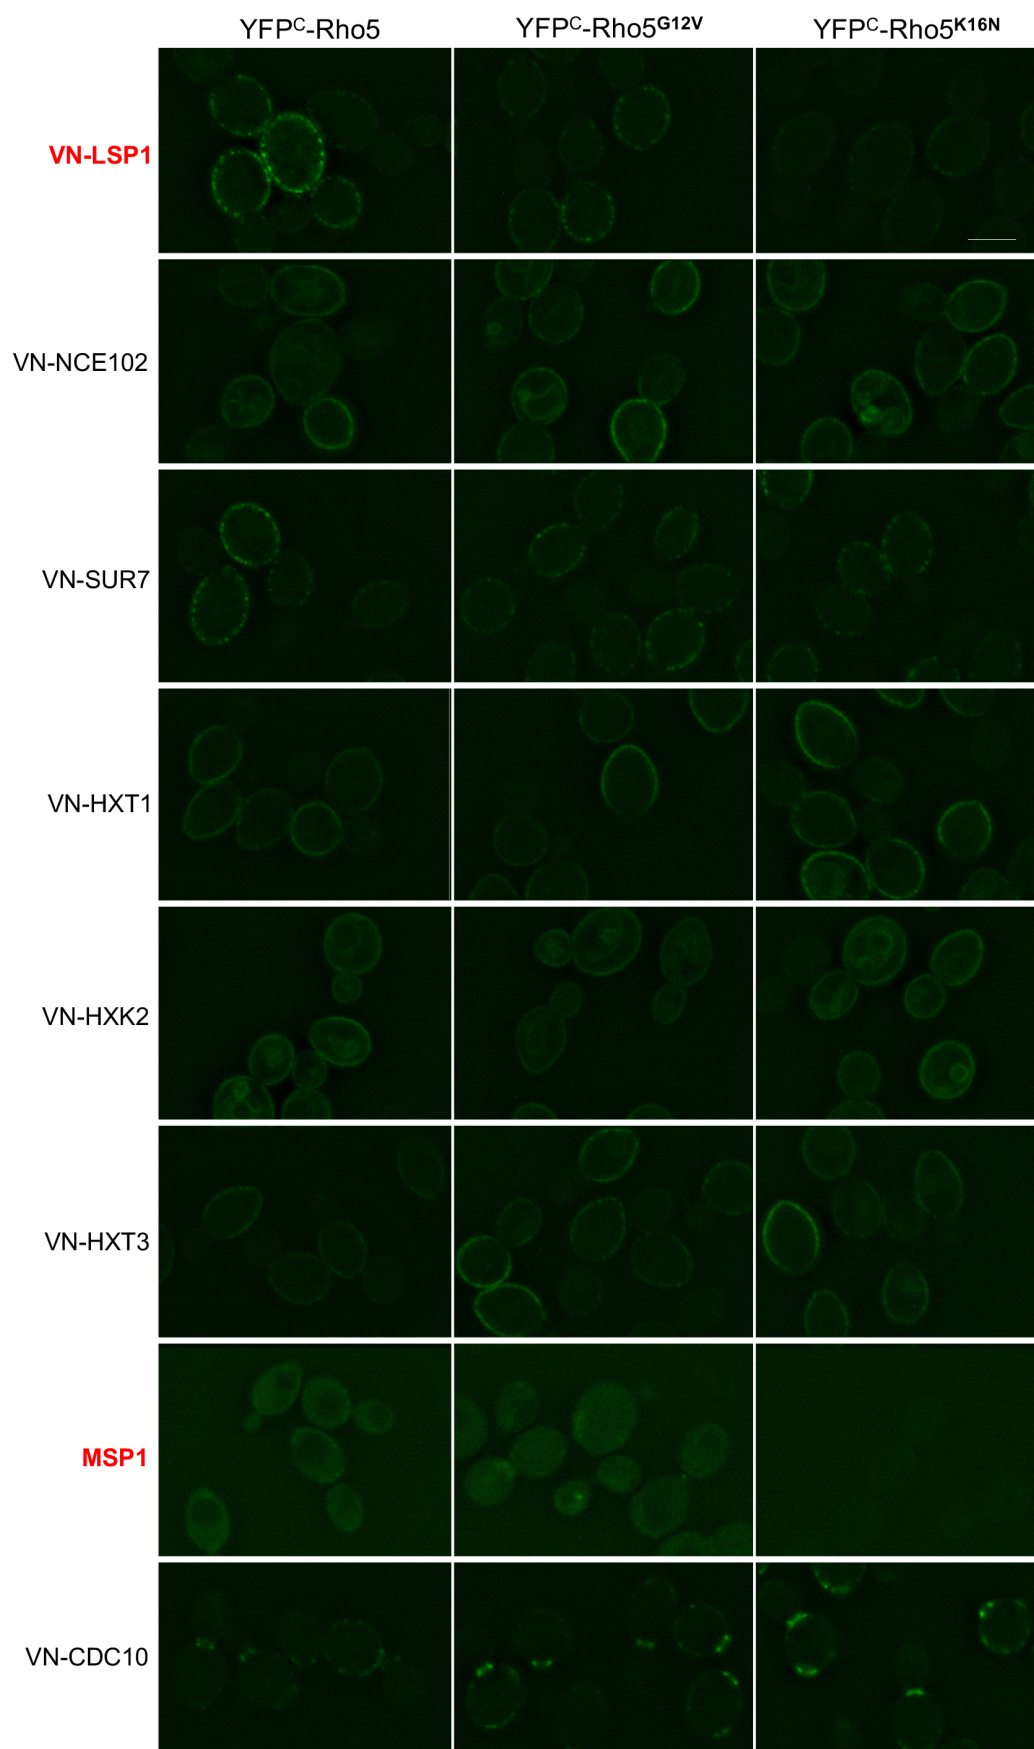

(continued)



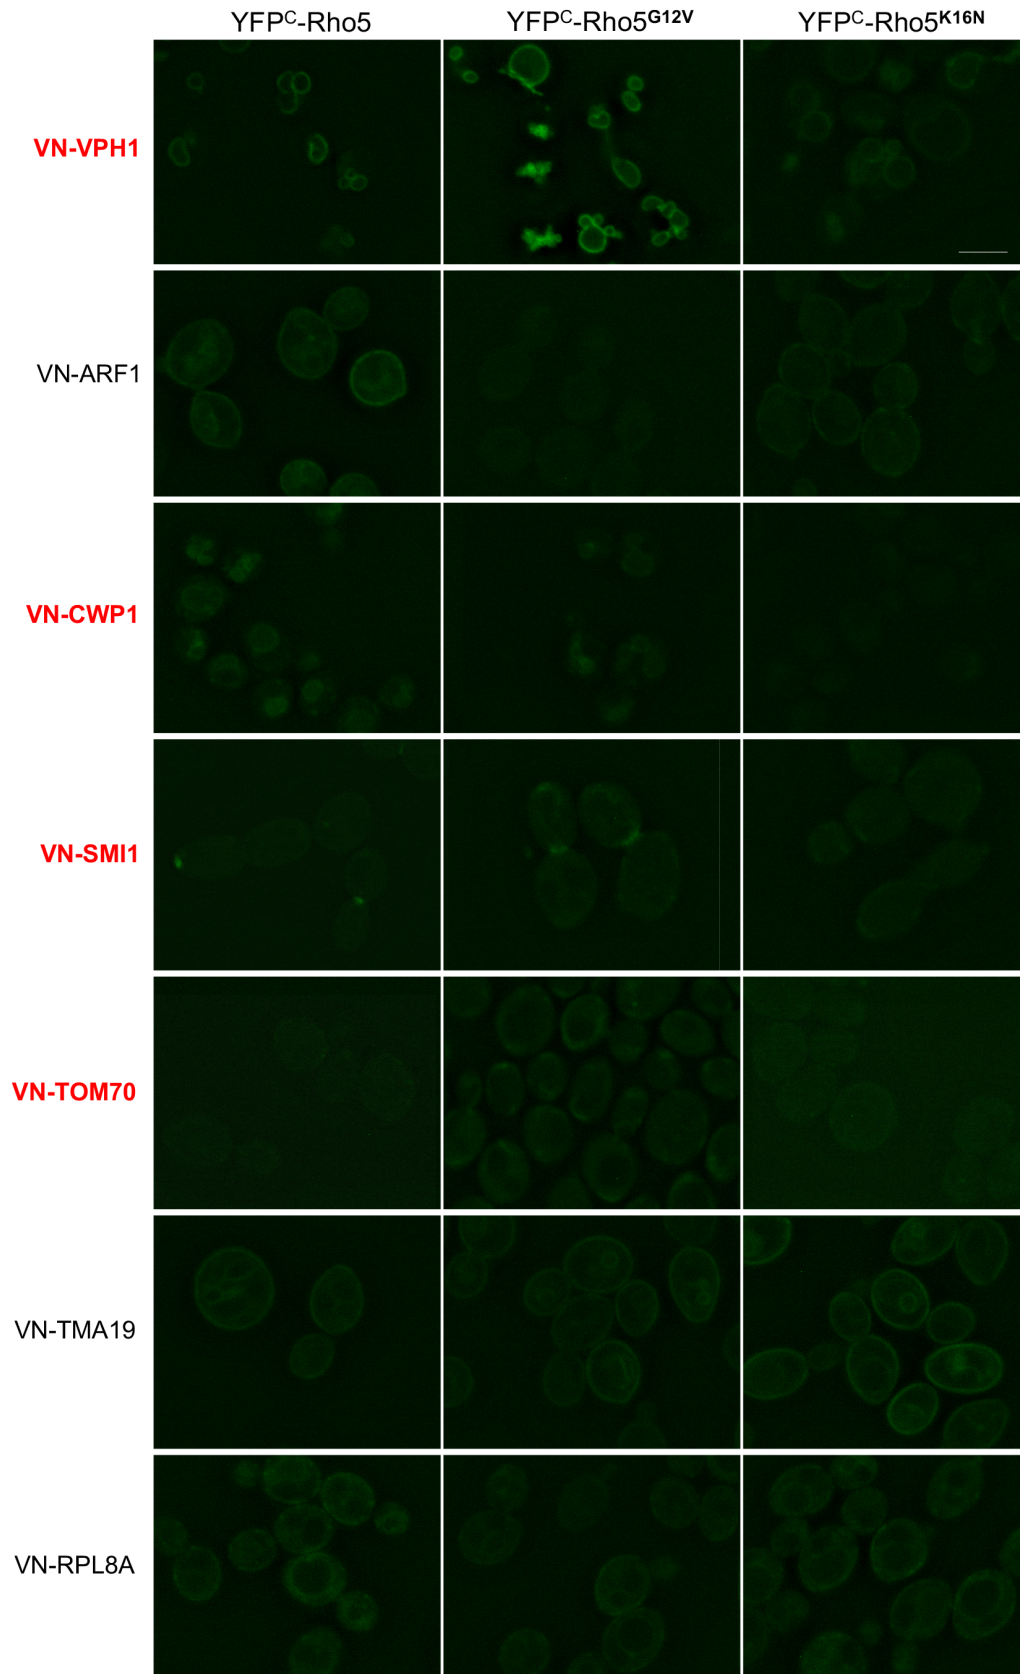

**Figure S2. BiFC analyses of candidate VN fusions with YFP<sup>C</sup> fusions of WT or mutant Rho5**  
 Each marked VN fusion was expressed together with YFP<sup>C</sup>-Rho5<sup>WT</sup>, YFP<sup>C</sup>-Rho5<sup>G12V</sup>, or YFP<sup>C</sup>-Rho5<sup>K16N</sup>. Those VN fusions that showed preferentially stronger fluorescence signals with YFP<sup>C</sup>-Rho5<sup>G12V</sup> or YFP<sup>C</sup>-Rho5<sup>WT</sup> are labeled in red.
